# Supplementary material for: On the abundance and source contributions of dicarboxylic acids in size-resolved aerosol particles at continental sites in central Europe
Source: Copernicus journal article supplement (doi:10.5194/acp-14-3913-2014), 2014-04-17
Supplement: Supplementary file 1 [file acp-14-3913-2014-supplement.pdf]

# On the abundance and source contributions of dicarboxylic acids in size-resolved aerosol particles at continental sites in Central Europe

Dominik van Pinxteren<sup>1</sup>, Christian Neusüß<sup>2</sup>, Hartmut Herrmann<sup>1</sup>

1 Leibniz-Institut für Troposphärenforschung (TROPOS), Permoserstr. 15, 04318 Leipzig, Germany

2 Hochschule Aalen, Beethovenstr. 1, 73430 Aalen, Germany

## Supplementary Material

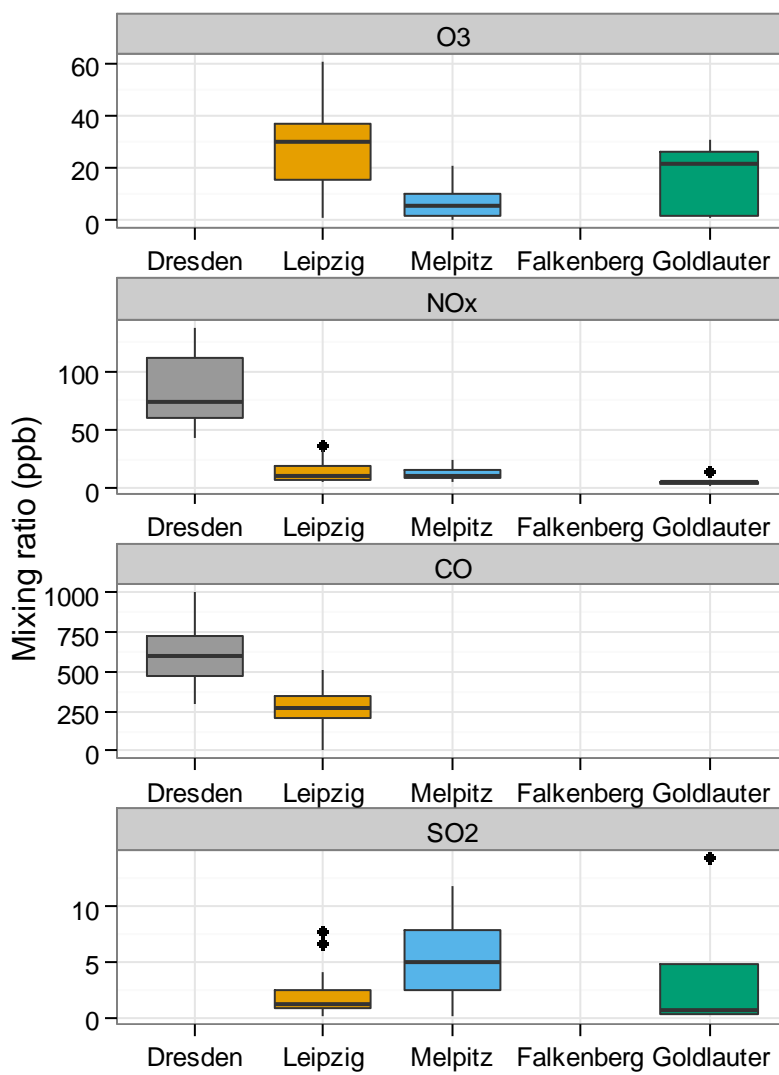

Figure S1: Box-plots of trace gas mixing ratios O<sub>3</sub>, NO<sub>x</sub>, CO, and SO<sub>2</sub> at different sampling sites.
